# Supplementary material for: Assessment of Neonatal Intensive Care Unit Practices and Preterm Newborn Gut Microbiota and 2-Year Neurodevelopmental Outcomes
Source: PubMed Central journal article supplement (PMC7512059; doi:10.1001/jamanetworkopen.2020.18119), 2020-09-23

## Supplementary Online Content

Rozé JC, Ancel PY, Marchand-Martin L, et al; EPIFLORE Study Group. Assessment of neonatal intensive care unit practices and preterm newborn gut microbiota and 2-year neurodevelopmental outcomes. *JAMA Netw Open*. 2020;3(9):e2018119. doi:10.1001/jamanetworkopen.2020.18119

**eMethods.** Neonatal intensive care units' strategies

**eTable 1.** Comparison between preterm infants with and without faecal collect among eligible preterm infants

**eTable 2.** Characteristics of preterm infants, their mothers and the individual treatments received by preterm infants according to the cluster describing microbiota at one month after birth

**eTable 3.** Characteristics of preterm infants, their mothers and the treatment strategies of the NICU where the preterm infant was hospitalized at day 7 according to the cluster describing microbiota at one month after birth

**eTable 4.** Association between microbiota cluster and 2 years-outcome: Complete cases analysis

**eFigure 1.** Flow chart

**eFigure 2.** Difference between observed and expected percent of eight practices in 60 neonatal intensive care units participating in EPIPAGE study

**eFigure 3.** Practice strategies of the 18 neonatal intensive care units (NICU) participating to EPIFLORE project where more 10 infants were hospitalized

**eFigure 4:** Principal coordinate analysis (PCoA) plots of the Bray-Curtis distance at the genus (A) and OTUs (B) taxonomic profiles

**eFigure 5.** Skin-to-skin practice as risk factor for cluster 3, the most mature microbiota

**eFigure 6.** Repartition of microbiota clusters according to gestational age and 2 year-outcome (complete cases)

## eMethod

- **Nutrition strategies of NICUs**

We characterized 8 strategies for each neonatal intensive care units (NICUs) as previously described (1), no intubation or extubation during the first 24 hours after birth, use of sedation during the first week after birth, direct breastfeeding during the first week after birth, skin to skin during the first week after birth, and treatment of ductus arteriosus during the first ten days after birth, speed of progression of enteral feeding during the first week after birth, duration of primary antibiotherapy started during the first 48 hours after birth and duration of secondary antibiotherapy.

- **Strategies concerning received or not received treatments**

For the first 5 strategies concerning received or not received treatments, a probability to receive each treatment for each preterm infant was calculated by logistic regression, according to gestational age, birth weight Z-score, sex, inborn or outborn, mode of birth, type of prematurity, single or multiple pregnancy, antenatal corticosteroid administration, Apgar score, number of administered doses of surfactant, birth nationality of mother and socioeconomic level of the parents using EPIPAGE2 database. From the average of the probabilities of receiving the treatment for children from the same NICU, we calculated an expected percentage to have this strategy applied in this NICU. If the observed difference in percentage was zero or greater than the expected percentage, the NICU strategy was considered favourable to the application of this strategy. If the difference was negative, the strategy was considered unfavourable.

### **No intubation or extubation during the first 24 hours after birth**

For each infant<sub>i</sub>, a probability,  $p(\text{Infant}_i)$ , to be not intubated or extubated during the first 24 hours after birth was calculated by logistic regression according the characteristics of the preterm infant and his parents. Then we calculated an expected percentage of to be not intubated or extubated during the first 24 hours after birth for each NICU, expressed as %, according to the following formula:

Expected percentage of infants not intubated or extubated during the first 24 hours after birth of one NICU  
$$= 100 \times (\sum_0^N (p(\text{Infant}_i))) / \text{Number of infants of this NICU}$$

Then we calculated the difference between the observed and the expected percentage of infants not intubated or extubated during the first 24 hours after birth for each unit. If the difference  $\geq$  or  $<$  zero, the NICU was considered favourable or not favourable to limit intubation, respectively.

### **Use of sedation during the first week after birth**

For each infant<sub>i</sub>, a probability,  $p(\text{Infant}_i)$ , to receive sedation during the first week after birth was calculated by logistic regression according the characteristics of the preterm infant and his parents. Then we calculated an expected percentage of to be sedated during the first week after birth for each NICU, expressed as %, according to the following formula :

Expected percentage of infants sedated during the first week after birth of one NICU  
$$= 100 \times (\sum_0^N (p(\text{Infant}_i))) / \text{Number of infants of this NICU}$$

Then we calculated the difference between the observed and the expected percentage of infants receiving a sedation during the first week after birth for each unit. If the difference  $\geq$  or  $<$  zero, the NICU was considered favourable or not favourable to use of sedation, respectively.

### **Direct-Breastfeeding policy**

For each infant<sub>i</sub>, a probability,  $p(\text{Infant}_i)$ , to be partially direct-breastfed during the first week after birth was calculated by logistic regression according to gestational age, birth weight Z-score, sex, birth Nationality of mother, level of education. Then we calculated an expected percentage of partial direct-breastfeeding during the first week for each NICU, expressed as %, according to the following formula :

Expected percentage of infants partially direct-breastfed during the first week after birth of one NICU  
$$= 100 \times (\sum_0^N (p(\text{Infant}_i))) / \text{Number of infants of this NICU}$$

Then we calculated the difference between the observed and the expected percentage of infants direct breastfed during the first week after birth for each unit. If the difference  $\geq$  or  $<$  zero, the NICU was considered as favourable to direct breastfeeding or not favourable, respectively.

### **Skin to skin during the first week after birth**

For each infant<sub>i</sub>, a probability,  $p(\text{Infant}_i)$ , to be in skin to skin contact with at least one of the parents during the first week of life after birth was calculated by logistic regression according the characteristics of the preterm infant. Then we calculated an expected percentage of to be in skin-to-skin contact during the first week after birth for each NICU, expressed as %, according to the following formula :

Expected percentage of infants in skin to skin contact during the first week after birth of one NICU

$$= 100 \times (\sum_0^N (p(\text{Infant}_i)) / \text{Number of infants of this NICU})$$

Then we calculated the difference between the observed and the expected percentage of infants being in skin to skin contact during the first week after birth for each unit. If the difference  $\geq$  or  $<$  zero, the NICU was considered as favourable to skin to skin contact or not favourable, respectively.

### **Treatment of ductus arteriosus during the first ten days after birth**

For each infant<sub>i</sub> a probability,  $p(\text{Infant}_i)$ , to be treated by Ibuprofen during the first 10 days after birth was calculated by logistic regression according to the characteristics of the preterm infant. Then we calculated an expected percentage of to be treated by Ibuprofen during the first 10 days after birth for each NICU, expressed as %, according to the following formula :

Expected percentage of infants to be treated by Ibuprofen during the first 10 days after birth of one NICU

$$= 100 \times (\sum_0^N (p(\text{Infant}_i)) / \text{Number of infants of this NICU})$$

Then we calculated the difference between the observed and the expected percentage of infants receiving Ibuprofen during the first 10 days after birth for each unit. If the difference  $\geq$  or  $<$  zero, the NICU was considered as favourable to close ductus arteriosus during the first 10 days after birth or not favourable, respectively.

- **Strategies concerning duration or quantity of treatment**

### **Longer duration of primary antibiotic treatments**

Concerning primary antibiotic treatment started during the first 48 hours of life, an expected duration was calculated with an individual 95% confidence interval (CI), using linear regression according to explicative variables: type of prematurity, confirmed early neonatal infection and neonatal characteristics. If the observed duration was more than upper limit of the 95% CI, the duration of antibiotic treatment was considered as longer than the expected duration. As for other strategies, an expected probability for each infant was calculated by logistic regression. Expected percentage of infants with a longer duration of primary antibiotherapy of one NICU

$$= 100 \times (\sum_0^N (p(\text{Infant}_i)) / \text{Number of infants of this NICU})$$

Then we calculated the difference between the observed and the expected percentage of infants with longer duration of primary antibiotic treatment for each unit. If the difference  $\geq$  or  $<$  zero, the NICU was considered as favourable to longer duration of primary antibiotic therapy or not favourable, respectively.

### **Longer duration of secondary antibiotic treatments**

Concerning secondary antibiotic treatment administered, an expected duration was calculated with an individual 95% confidence interval (CI), using linear regression according to explicative variables: type of prematurity, confirmed secondary infection and neonatal characteristics. If the observed duration was more than upper limit of the 95% CI, the duration of antibiotic treatment was considered as longer than the expected duration. As for other strategies, an expected probability for each infant was calculated by logistic regression. Expected percentage of infants with a longer duration of secondary antibiotic therapy of one NICU

$$= 100 \times (\sum_0^N (p(\text{Infant}_i)) / \text{Number of infants of this NICU})$$

Then we calculated the difference between the observed and the expected percentage of infants with longer duration of secondary antibiotic treatment for each unit. If the difference  $\geq$  or  $<$  zero, the NICU was considered as favourable to longer duration of secondary antibiotic therapy or not favourable, respectively.

### **Speed of progression of enteral feeding**

We first calculated an expected enteral volume at day 7 with a 95% confidence interval (95%CI) for each infant, according to gestational age, birth weight Z-score and regularity of intestinal transit during the first 7 days. A low volume of enteral feeding was defined as a volume less than the lower limit of the 95%CI. As for other strategies, an expected probability to receive a low enteral volume at day 7 was calculated for each infant by logistic regression. Expected percentage of infants with a low enteral volume at day 7 of one NICU

$$= 100 \times (\sum_0^N (p(\text{Infant}_i)) / \text{Number of infants of this NICU})$$

Then we calculated the difference between the observed and the expected percentage of infants with low enteral volume at day 7 for each unit. If the difference  $\geq$  or  $<$  zero, the NICU was considered as favourable to provide low enteral feeding during the first 7 days after birth or not favourable, respectively.

**eTable 1. Comparison between preterm infants with and without faecal collect among eligible preterm infants.**

|                                                                       | Preterm with faecal collect at 1 month old |           | Eligible preterm without faecal collect* |           |         |
|-----------------------------------------------------------------------|--------------------------------------------|-----------|------------------------------------------|-----------|---------|
|                                                                       | n=577                                      |           | n=529                                    |           | p-value |
| <b>Gestational age</b>                                                |                                            |           |                                          |           |         |
| 24-26 weeks                                                           | 145/577                                    | 20.0      | 101/529                                  | 14.9      | <.001   |
| 27-29 weeks                                                           | 226/577                                    | 41.9      | 171/529                                  | 34.0      |         |
| 30-31 weeks                                                           | 206/577                                    | 38.2      | 257/529                                  | 51.1      |         |
| <b>Maternal characteristics</b>                                       |                                            |           |                                          |           |         |
| Maternal age                                                          |                                            |           |                                          |           |         |
| <25 years                                                             | 96/577                                     | 16.6      | 113/529                                  | 21.5      | .12     |
| 25-34 years                                                           | 342/577                                    | 59.4      | 296/529                                  | 55.4      |         |
| ≥35 years                                                             | 139/577                                    | 23.9      | 120/529                                  | 23.1      |         |
| Mother born outside France                                            |                                            |           |                                          |           |         |
| No                                                                    | 420/577                                    | 72.9      | 345/529                                  | 65.6      | .02     |
| Yes                                                                   | 154/577                                    | 26.6      | 176/529                                  | 33.0      |         |
| Missing                                                               | 3/577                                      | 0.5       | 8/529                                    | 1.4       |         |
| Mother level of education                                             |                                            |           |                                          |           |         |
| < Higher secondary school                                             | 151/577                                    | 26.6      | 140/529                                  | 27.1      | .17     |
| Higher secondary school                                               | 108/577                                    | 18.5      | 104/529                                  | 19.5      |         |
| High school diploma +1 +2                                             | 120/577                                    | 20.9      | 83/529                                   | 15.4      |         |
| > High school diploma +3                                              | 145/577                                    | 25.3      | 145/529                                  | 27.4      |         |
| Missing                                                               | 53/577                                     | 8.6       | 57/529                                   | 10.6      |         |
| Multiple pregnancy                                                    | 197/577                                    | 34        | 160/529                                  | 30.2      | .17     |
| <b>Neonatal factors</b>                                               |                                            |           |                                          |           |         |
| Male                                                                  | 300/577                                    | 52.0      | 274/529                                  | 51.8      | .95     |
| Birth weight Z-score†, mean(sd)                                       | 577                                        | 0.2 (1.0) | 529                                      | 0.1 (1.1) | .12     |
| Apgar score <7 at 5 minutes                                           |                                            |           |                                          |           |         |
| No                                                                    | 449/577                                    | 78.7      | 400/529                                  | 76.3      | .07     |
| Yes                                                                   | 94/577                                     | 15.7      | 108/529                                  | 19.9      |         |
| Missing                                                               | 34/577                                     | 5.6       | 21/529                                   | 3.8       |         |
| Gastrointestinal transit considered normal (at least one stool a day) |                                            |           |                                          |           |         |
| No                                                                    | 230/577                                    | 38.8      | 155/529                                  | 28.3      | <.001   |
| Yes                                                                   | 316/577                                    | 55.7      | 320/529                                  | 61.6      |         |
| Missing                                                               | 31/577                                     | 5.5       | 54/529                                   | 10.2      |         |
| Severe neonatal morbidities‡                                          |                                            |           |                                          |           |         |
| No                                                                    | 452/577                                    | 79.8      | 429/529                                  | 82.1      | .57     |
| Yes                                                                   | 102/577                                    | 16.5      | 79/529                                   | 14.2      |         |
| Missing                                                               | 23/577                                     | 3.7       | 21/529                                   | 3.7       |         |
| Died in neonatal intensive care unit                                  | 18/577                                     | 2.7       | 18/529                                   | 3.1       | .64     |
| <b>2 years corrected age</b>                                          |                                            |           |                                          |           |         |
| Cerebral palsy                                                        |                                            |           |                                          |           |         |
| No                                                                    | 459/559                                    | 82.1      | 72/511                                   | 14.2      | .58     |
| Yes                                                                   | 31/559                                     | 5.6       | 414/511                                  | 81.0      |         |
| Missing                                                               | 69/559                                     | 12.3      | 25/511                                   | 4.8       |         |
| Ages and Stages Questionnaire (ASQ) score < 185                       |                                            |           |                                          |           |         |
| No                                                                    | 307/388                                    | 79.3      | 251/330                                  | 77.0      | .52     |
| Yes                                                                   | 65/388                                     | 16.4      | 67/330                                   | 19.5      |         |
| Missing                                                               | 16/388                                     | 4.3       | 12/330                                   | 3.6       |         |

Complete cases analysis. Data are number of events/number in group (percentages). Percentages are weighted to take into account the differences in survey design between gestational age groups. Denominators vary according to the number of missing data for each variable.

\* Eligible survivors at J21 non included in EPIFLORE project n=386 or included without faecal collect 1 month old n=143).

† Score based on Olsen curves.

‡ Severe neonatal morbidity was defined as severe bronchopulmonary dysplasia or necrotizing enterocolitis stage 2-3 or severe retinopathy of prematurity stage >3 or any of the following severe cerebral abnormalities on cranial ultrasonography: intraventricular haemorrhage grade III or IV or cystic periventricular leukomalacia (Ancel 2015).

**eTable 2. Characteristics of preterm infants, their mothers and the individual treatments received by preterm infants according to the cluster describing microbiota at one month after birth.**

|                                                                       | Cluster 1           | Cluster 2         | Cluster 4          | Cluster 5            | Cluster 6          |          |
|-----------------------------------------------------------------------|---------------------|-------------------|--------------------|----------------------|--------------------|----------|
|                                                                       | vs Cluster 3 (n=61) |                   |                    |                      |                    |          |
|                                                                       | n=240               | n=68              | n=63               | n=52                 | n=93               | p-value* |
| <b>Gestational age</b>                                                |                     |                   |                    |                      |                    |          |
| 24-26 weeks                                                           | 2.42 (0.74-7.97)    | 2.08 (0.50-8.72)  | 12.60 (2.89-54.86) | 66.29 (11.79-372.84) | 20.23 (4.97-82.34) | <.001    |
| 27-29 weeks                                                           | 2.34 (1.08-5.06)    | 1.96 (0.77-5.01)  | 6.74 (2.32-19.57)  | 8.77 (2.11-36.50)    | 6.17 (2.14-17.79)  |          |
| 30-31 weeks                                                           | 1                   | 1                 | 1                  | 1                    | 1                  |          |
| <b>Maternal characteristics</b>                                       |                     |                   |                    |                      |                    |          |
| Country of birth of the mother                                        |                     |                   |                    |                      |                    |          |
| France                                                                | 1                   | 1                 | 1                  | 1                    | 1                  | .03      |
| North Africa countries                                                | 2.20 (0.60-8.08)    | 6.81 (1.82-25.52) | 1.14 (0.20-6.43)   | 3.05 (0.61-15.35)    | 2.49 (0.57-10.92)  |          |
| Other African countries                                               | 2.41 (0.72-8.00)    | 0.33 (0.03-3.16)  | 1.63 (0.37-7.12)   | 2.78 (0.62-12.51)    | 1.85 (0.46-7.43)   |          |
| Other                                                                 | 1.84 (0.48-7.00)    | 1.13 (0.21-6.14)  | 2.65 (0.55-12.63)  | 4.98 (0.86-28.91)    | 1.71 (0.32-9.25)   |          |
| <b>Neonatal factors</b>                                               |                     |                   |                    |                      |                    |          |
| Birth weight Z-score†, mean(sd)                                       | 1.06 (0.76-1.46)    | 0.69 (0.46-1.03)  | 0.64 (0.42-0.99)   | 0.82 (0.51-1.33)     | 0.79 (0.53-1.18)   | .02      |
| Cesarean section                                                      | 2.73 (1.42-5.26)    | 1.36 (0.62-3.00)  | 1.98 (0.85-4.60)   | 7.23 (2.58-20.21)    | 2.67 (1.17-6.09)   | .002     |
| <b>Neonatal factors and individual therapeutics</b>                   |                     |                   |                    |                      |                    |          |
| Surfactant during first days of life                                  | 1.00 (0.50-2.00)    | 1.12 (0.47-2.66)  | 1.08 (0.41-2.83)   | 1.06 (0.31-3.58)     | 0.77 (0.30-1.95)   | .97      |
| Ductus arteriosus treatment before in the first ten days of life      | 1.86 (0.67-5.17)    | 2.25 (0.69-7.33)  | 3.96 (1.28-12.26)  | 1.22 (0.37-4.10)     | 2.47 (0.84-7.27)   | .08      |
| Late infection (after 72 hours of life and before the stool collect)  | 1.42 (0.57-3.56)    | 0.59 (0.18-1.94)  | 1.33 (0.47-3.78)   | 2.30 (0.78-6.80)     | 3.98 (1.50-10.51)  | <.001    |
| Low volume of enteral nutrition at day 7                              | 0.44 (0.19-0.99)    | 0.37 (0.13-1.00)  | 0.41 (0.15-1.09)   | 0.91 (0.31-2.66)     | 0.96 (0.39-2.41)   | .03      |
| Gastrointestinal transit considered normal (at least one stool a day) | 0.56 (0.26-1.19)    | 0.41 (0.17-0.97)  | 0.35 (0.14-0.87)   | 0.20 (0.07-0.56)     | 0.53 (0.22-1.23)   | .03      |
| Practice of skin-to-skin contact during the first week of life        | 0.81 (0.39-1.65)    | 0.76 (0.33-1.76)  | 0.78 (0.33-1.87)   | 0.45 (0.16-1.24)     | 0.49 (0.18-1.36)   | .36      |
| Mother's milk during first week                                       | 0.37 (0.19-0.73)    | 0.50 (0.22-1.12)  | 0.57 (0.24-1.33)   | 0.43 (0.17-1.11)     | 0.40 (0.18-0.91)   | .10      |

Multiple imputation analysis. Mixed-effects logistic regression with a random hospital intercept. The models included all table covariates.

\* Global chi squared test.

† Score based on Olsen curves.

**eTable 3. Characteristics of preterm infants, their mothers and the treatment strategies of the NICU where the preterm infant was hospitalized at day 7 according to the cluster describing microbiota at one month after birth.**

|                                                     | Cluster 1           | Cluster 2         | Cluster 4            | Cluster 5             | Cluster 6           |          |
|-----------------------------------------------------|---------------------|-------------------|----------------------|-----------------------|---------------------|----------|
|                                                     | vs Cluster 3 (n=61) |                   |                      |                       |                     |          |
|                                                     | n=240               | n=68              | n=63                 | n=52                  | n=93                | p-value* |
| <b>Gestational age</b>                              |                     |                   |                      |                       |                     |          |
| 24-26 weeks                                         | 3.30 (1.12-9.69)    | 3.14 (0.84-11.69) | 39.22 (10.37-148.40) | 304.99 (62.04-1499.4) | 94.06 (25.69-344.3) | <.001    |
| 27-29 weeks                                         | 2.29 (1.15-4.57)    | 2.09 (0.90-4.86)  | 9.81 (3.71-25.98)    | 14.84 (3.95-55.75)    | 10.69 (4.05-28.25)  |          |
| 30-31 weeks                                         | 1                   | 1                 | 1                    | 1                     | 1                   |          |
| <b>Maternal characteristics</b>                     |                     |                   |                      |                       |                     |          |
| Country of birth of the mother                      |                     |                   |                      |                       |                     |          |
| France                                              | 1                   | 1                 | 1                    | 1                     | 1                   | 026      |
| North Africa countries                              | 1.77 (0.48-6.51)    | 6.11 (1.60-23.40) | 0.81 (0.14-4.60)     | 2.08 (0.40-10.72)     | 1.69 (0.38-7.56)    |          |
| Other African countries                             | 1.89 (0.56-6.38)    | 0.29 (0.03-2.87)  | 1.13 (0.25-5.16)     | 2.21 (0.48-10.27)     | 1.33 (0.31-5.63)    |          |
| Other                                               | 1.85 (0.49-7.01)    | 1.43 (0.26-7.88)  | 2.80 (0.56-13.89)    | 4.31 (0.72-25.67)     | 1.53 (0.27-8.68)    |          |
| <b>Neonatal factors</b>                             |                     |                   |                      |                       |                     |          |
| Birth weight Z-score†, mean(sd)                     | 1.17 (0.85-1.60)    | 0.82 (0.56-1.21)  | 0.69 (0.46-1.04)     | 0.70 (0.44-1.13)      | 0.66 (0.44-0.98)    | .001     |
| Cesarean section                                    | 3.01 (1.55-5.86)    | 1.51 (0.67-3.43)  | 2.40 (1.00-5.75)     | 8.97 (3.17-25.34)     | 3.30 (1.43-7.62)    | <.001    |
| <b>NICU's strategie‡</b>                            |                     |                   |                      |                       |                     |          |
| No intubation or extubation at day 1                | 0.71 (0.28-1.77)    | 0.56 (0.19-1.66)  | 0.41 (0.13-1.28)     | 0.21 (0.06-0.78)      | 0.19 (0.06-0.62)    | .03      |
| Sedation during the first week                      | 1.89 (0.63-5.62)    | 1.49 (0.43-5.21)  | 2.31 (0.64-8.37)     | 10.55 (2.28-48.87)    | 4.62 (1.32-16.18)   | .02      |
| Medication to close ductus arteriosus before day 10 | 0.96 (0.46-1.97)    | 0.71 (0.30-1.66)  | 0.94 (0.38-2.32)     | 0.89 (0.33-2.45)      | 0.62 (0.26-1.48)    | .74      |
| Longer duration of primary antibiotherapy           | 0.93 (0.42-2.06)    | 0.84 (0.31-2.24)  | 1.03 (0.36-2.95)     | 0.56 (0.16-1.94)      | 0.45 (0.15-1.32)    | .57      |
| Longer duration of secondary antibiotherapy         | 2.06 (0.76-5.62)    | 0.77 (0.24-2.48)  | 0.71 (0.22-2.31)     | 0.75 (0.20-2.78)      | 1.64 (0.52-5.20)    | .02      |
| Low volume of enteral nutrition at day 7            | 1.97 (0.63-6.18)    | 4.81 (1.38-16.77) | 5.96 (1.64-21.64)    | 10.48 (2.48-44.29)    | 7.28 (2.03-26.18)   | .001     |
| Skin to skin during the first week                  | 0.38 (0.16-0.90)    | 0.47 (0.17-1.30)  | 0.36 (0.12-1.06)     | 0.14 (0.04-0.48)      | 0.33 (0.11-0.95)    | .07      |
| Direct breastfeeding during the first week          | 0.76 (0.24-2.35)    | 0.40 (0.08-1.98)  | 0.25 (0.04-1.45)     | 0.23 (0.03-1.96)      | 0.43 (0.09-2.14)    | .52      |

Abbreviations: NICU, neonatal intensive care unit.

Multiple imputation analysis. Mixed-effects logistic regression with a random hospital intercept. The models included all table covariates.

\* Global chi squared test.

† Score based on Olsen curves.

‡ Favorable strategie, the observed percentage was zero or greater than the expected percentage of infant receiving the treatment or practice.

**eTable 4. Association between microbiota cluster and 2 years-outcome: Complete cases analysis.**

|                                                             | n/N    | %    | p-value | weighted % | p-value | AdjOR1                 | p-value | AdjOR2                 | p-value |
|-------------------------------------------------------------|--------|------|---------|------------|---------|------------------------|---------|------------------------|---------|
| <b>Death or ASQ score &lt; 185 at 2 years corrected age</b> |        |      |         |            |         |                        |         |                        |         |
| Cluster 1                                                   | 24/162 | 14.8 | <.001   | 14.9       | <.001   | 3.04 (0.68 to 13.70)   | .065    | 3.06 (0.68 to 13.66)   | .01     |
| Cluster 2                                                   | 10/50  | 20.0 |         | 20.5       |         | 4.95 (1.00 to 24.51)   |         | 4.59 (0.94 to 22.48)   |         |
| Cluster 3                                                   | 2/40   | 5.0  |         | 4.4        |         | 1                      |         | 1                      |         |
| Cluster 4                                                   | 11/37  | 29.7 |         | 28.9       |         | 6.40 (1.24 to 33.15)   |         | 6.50 (1.28 to 32.91)   |         |
| Cluster 5                                                   | 14/39  | 35.9 |         | 36.1       |         | 8.64 (1.67 to 44.65)   |         | 8.12 (1.61 to 40.93)   |         |
| Cluster 6                                                   | 26/66  | 39.4 |         | 37.5       |         | 10.49 (2.18 to 50.53)  |         | 9.46 (1.99 to 44.87)   |         |
| <b>Death or cerebral palsy at 2 years corrected age</b>     |        |      |         |            |         |                        |         |                        |         |
| Cluster 1                                                   | 11/210 | 5.2  | <.001   | 5.2        | <.001   | 2.70 (0.33 to 22.12)   | .003    | 2.82 (0.35 to 22.77)   | .005    |
| Cluster 2                                                   | 6/62   | 9.7  |         | 10.0       |         | 6.25 (0.69 to 56.37)   |         | 5.69 (0.65 to 49.94)   |         |
| Cluster 3                                                   | 1/57   | 1.8  |         | 1.8        |         | 1                      |         | 1                      |         |
| Cluster 4                                                   | 8/52   | 15.4 |         | 14.6       |         | 7.09 (0.79 to 63.54)   |         | 7.43 (0.85 to 65.06)   |         |
| Cluster 5                                                   | 5/46   | 10.9 |         | 11.5       |         | 5.38 (0.54 to 53.46)   |         | 4.80 (0.50 to 45.84)   |         |
| Cluster 6                                                   | 22/85  | 25.9 |         | 25.0       |         | 15.00 (1.79 to 125.77) |         | 13.80 (1.68 to 113.13) |         |

Abbreviation: NICU, neonatal intensive care unit; ASQ, ages and stages questionnaire.

Odds ratio are estimated using mixed-effects logistic regression with a random hospital intercept. Percentages are weighted to take into account the differences in survey design between gestational age groups.

AdjOR1 : adjusted for gestational age by week.

AdjOR2 : adjusted for gestational age, continuous variable.

**eFigure 1. Flow chart**

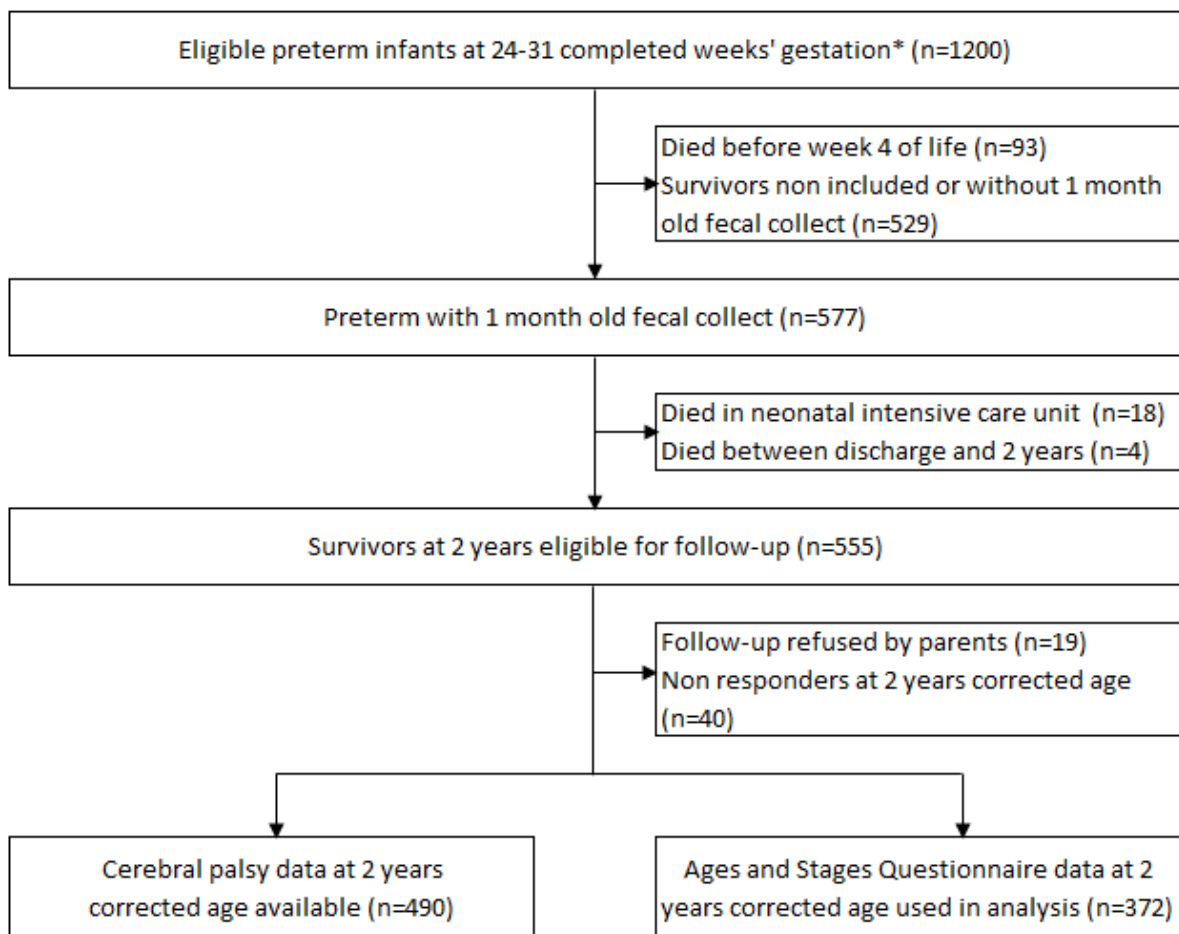

\*Included in EPIPAGE2 and hospitalized in NICUs participating in EPIFLORE study.

\*\* ASQ completed between 22 and 26 months' corrected age

NICUs: Neonatal intensive care units; ASQ: Ages and Stages Questionnaire.



## eFigure 2. Difference between observed and expected percent of eight practices in 60 neonatal intensive care units participating in EPIPAGE study

All neonatal intensive care units (NICUs) participating in EPIPAGE 2 study are represented. The white open circles represent NICUs that did not participate in EPIFLORE study. The black solid circles represent the NICUs participating to EPIFLORE study. On the Y axis, differences between observed and expected percentage of infants receiving the treatment in each NICU are represented, NICU by NICU.

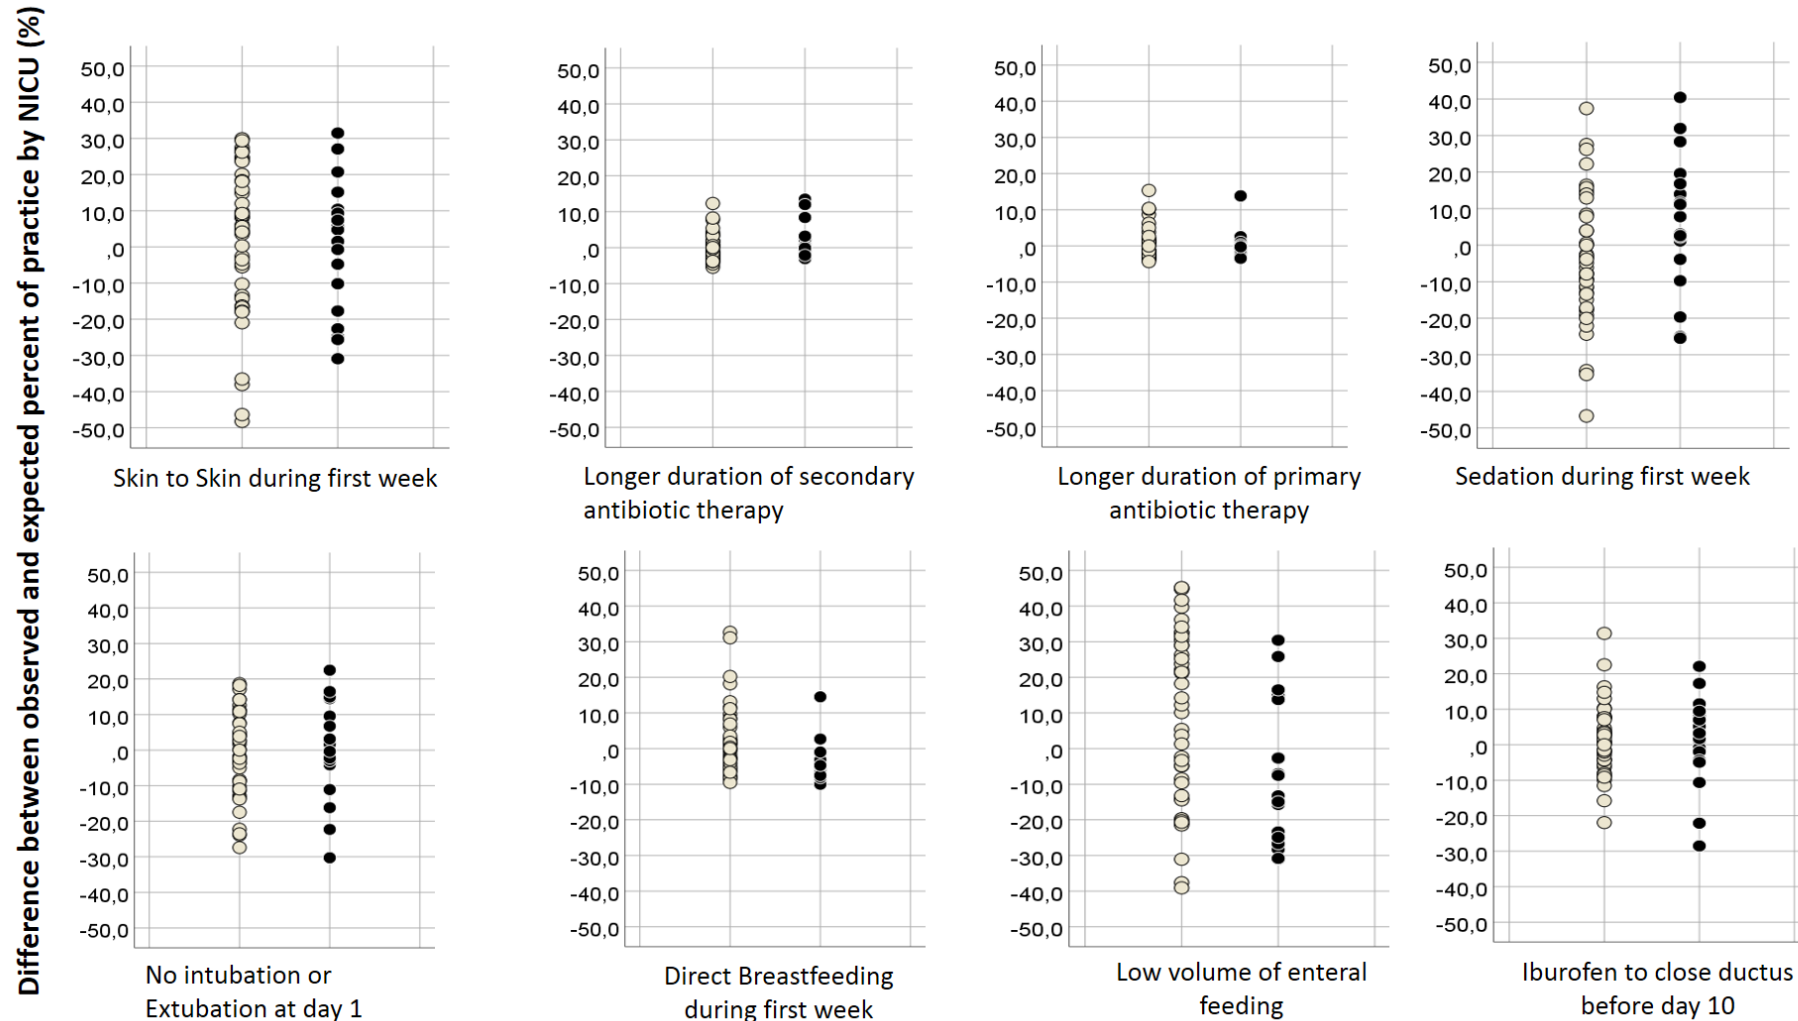

**eFigure 3: Practice strategies of the eighteen neonatal intensive care units (NICU) participating to EPIFLORE project where more 10 infants were hospitalized.**

Each NICU participating to EPIFLORE study is represented by a letter. For each strategy, the colour of the corresponding square is green if the strategy of the concerned NICU is favourable, red if it is not favourable to the concerned strategy.

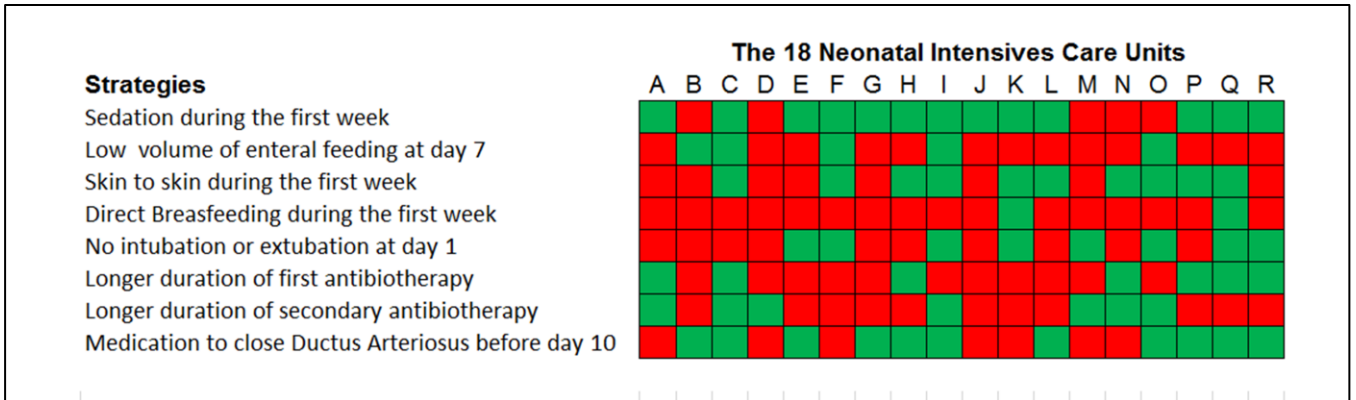

**eFigure 4: Principal coordinate analysis (PCoA) plots of the Bray-Curtis distance at the genus (A) and OTUs (B) taxonomic profiles.**

The five clusters are represented by different colours. For both plots, Comp1= 28% and Comp2= 14%

A

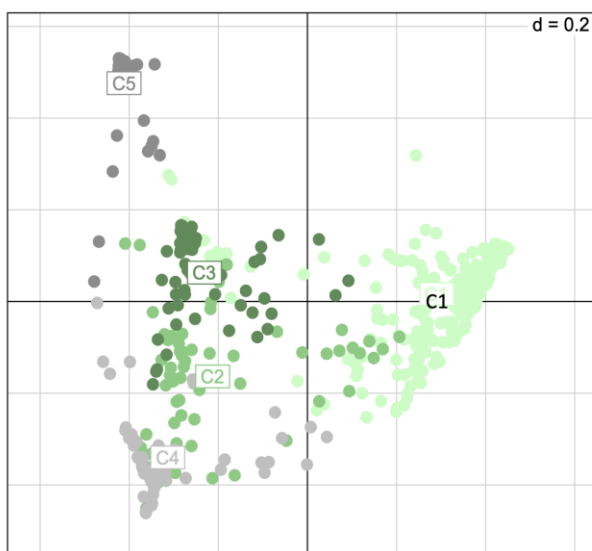

B

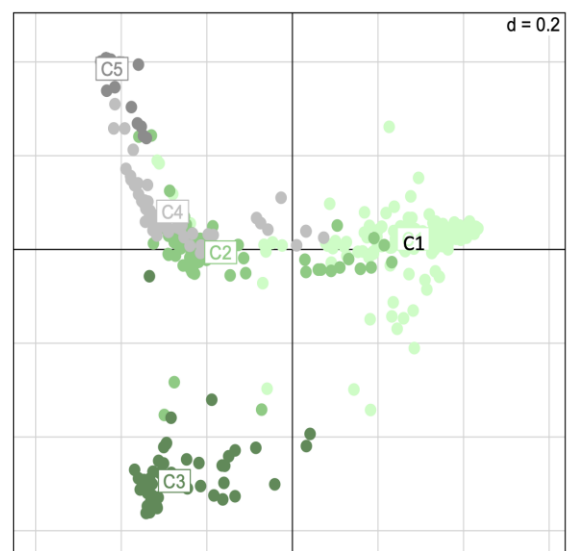

**eFigure 5. Skin-to-skin practice as risk factor for cluster 3, the most mature microbiota.**

Percentage of preterm infants with a more mature microbiota (cluster 3) during the first month after birth depending on whether the preterm infants has been in skin to skin contact with parents during the first week after birth among NICUs with a strategy favourable or not favourable to skin to skin contact with parents. Adjusted odds ratios represent the probability to be in cluster 3 adjusted on propensity score to be in skin to skin contact during the first week after birth. We observed interaction between skin to skin contact with parents and NICU’s strategy concerning skin to skin (p=0.01).

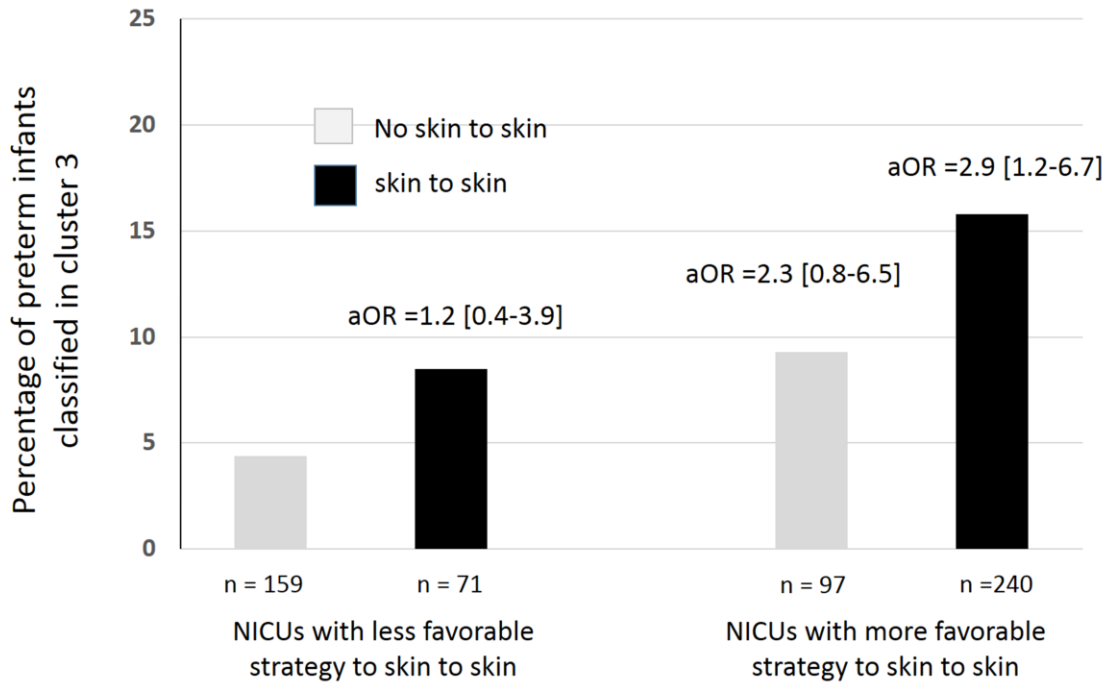

**eFigure 6. Repartition of microbiota clusters according to gestational age and 2 year-outcome (complete cases).**

Two year-outcome is defined by death or Age and Stages Questionnaires' score less than 185 at 2 years on the part A of the figure, and by death or cerebral palsy on the part B of the figure.

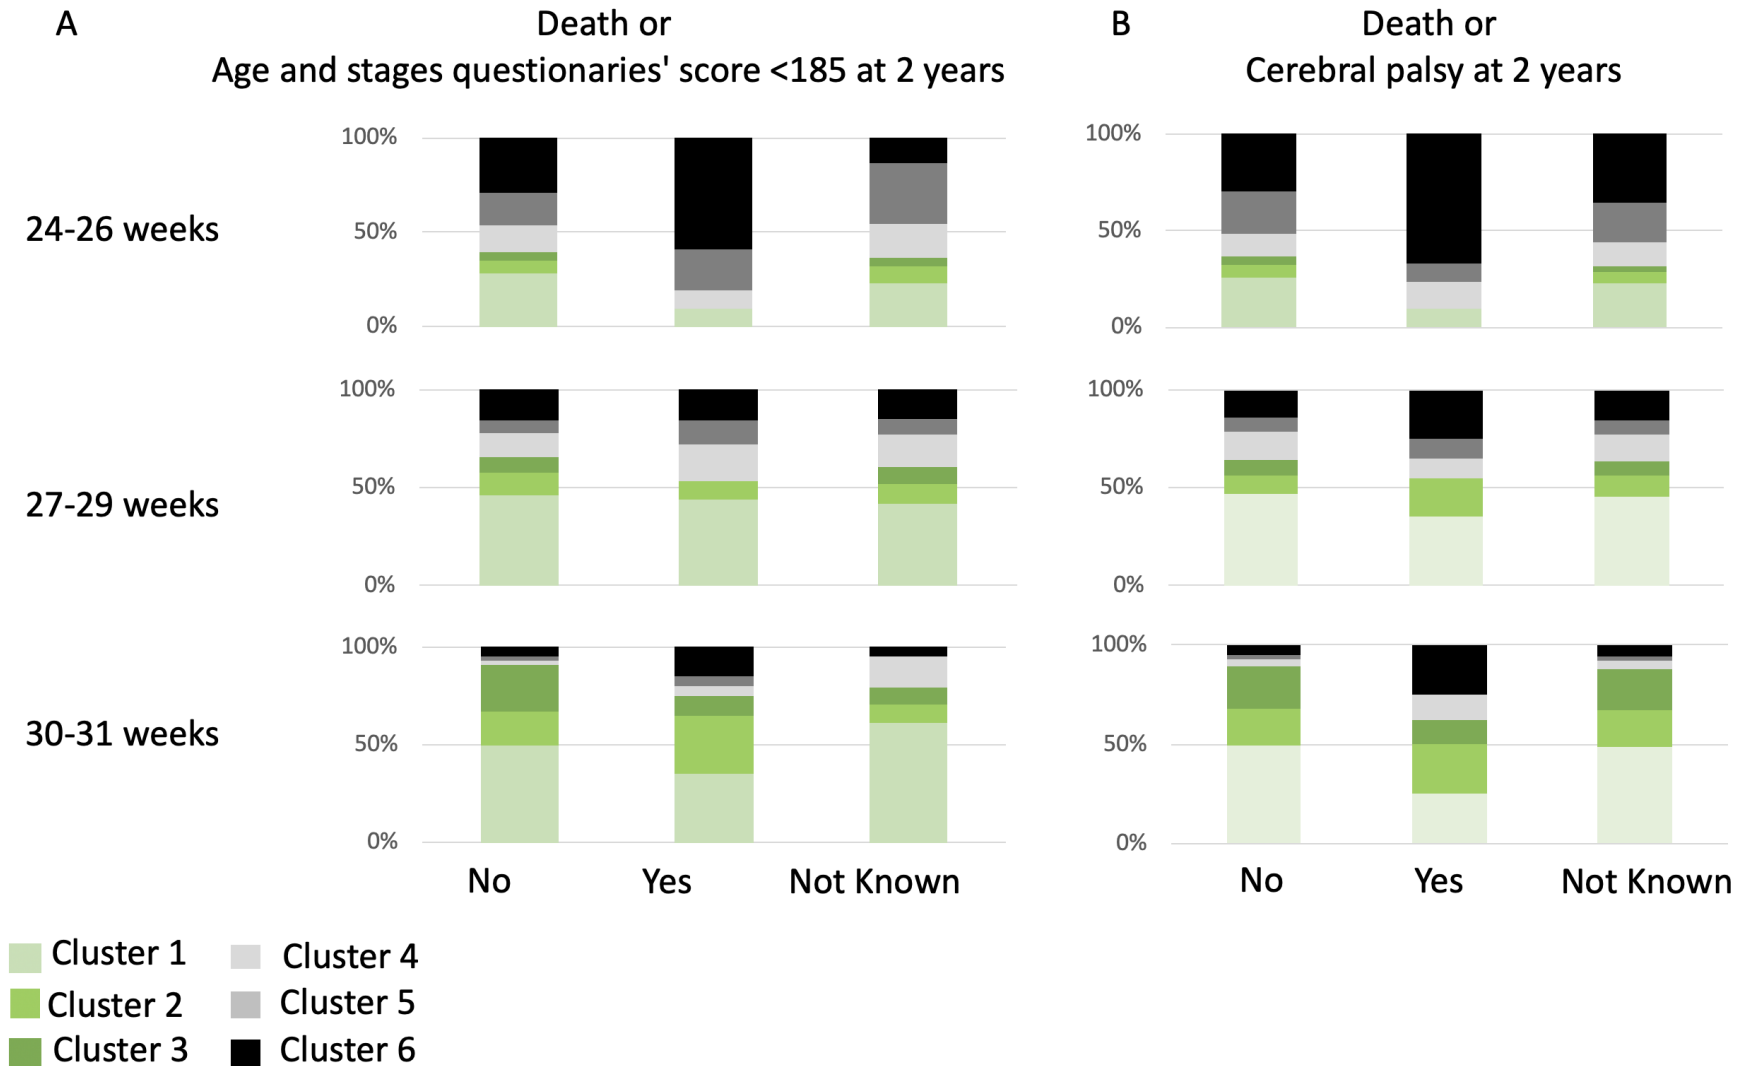

Supplement: jamanetwopen-e2018119-s001.pdf [file jamanetwopen-e2018119-s001.pdf]
